# Supplementary material
Source: PubMed Central journal article supplement (PMC7250782)
Supplement: mmc1.pdf [file mmc1.pdf]

**Appendix**  
**Clinical Characteristics, Associated Factors, and Predicting COVID-19 Mortality Risk:**  
**A Retrospective Study in Wuhan, China**  
**Yu et al.**

**Appendix Table 1.** Associations (OR [95% CI]) of PCT and LY With COVID-19 Mortality

| Variable                | Tertile of PCT and LY |                   |                    | Per SD of PCT and LY   | <i>p</i> for trend |
|-------------------------|-----------------------|-------------------|--------------------|------------------------|--------------------|
|                         | T1                    | T2                | T3                 |                        |                    |
| PCT, ng/ml              | <0.04                 | 0.04–0.07         | ≥0.07              |                        |                    |
| N case/n total          | 10/308 (3.3)          | 40/436 (9.2)      | 95/396 (24.0)      | Per SD of PCT increase |                    |
| Unadjusted              | ref                   | 3.01 (1.48, 6.12) | 9.41 (4.81, 18.40) | 4.27 (2.56, 7.11)      | <b>&lt;0.0001</b>  |
| Model 1                 | ref                   | 2.27 (1.11, 4.66) | 6.90 (3.49, 13.65) | 3.65 (2.25, 5.90)      | <b>&lt;0.0001</b>  |
| Model 2                 | ref                   | 2.31 (1.12, 4.77) | 6.30 (3.16, 12.56) | 3.39 (2.10, 5.46)      | <b>&lt;0.0001</b>  |
| Model 3a                | ref                   | 2.94 (1.27, 6.80) | 8.25 (3.64, 18.69) | 3.91 (2.22, 6.91)      | <b>&lt;0.0001</b>  |
| LY, ×10 <sup>9</sup> /L | <0.88                 | 0.88–1.32         | ≥1.32              |                        |                    |
| N case/n total          | 74/445 (16.6)         | 55/441 (12.5)     | 40/461 (8.7)       | Per SD of LY decrease  |                    |
| Unadjusted              | 2.10 (1.39, 3.16)     | 1.50 (0.98, 2.31) | ref                | 1.45 (1.21, 1.74)      | <b>0.0003</b>      |
| Model 1                 | 1.75 (1.15, 2.67)     | 1.35 (0.87, 2.10) | ref                | 1.34 (1.11, 1.61)      | <b>0.009</b>       |
| Model 2                 | 1.65 (1.08, 2.53)     | 1.29 (0.83, 2.02) | ref                | 1.31 (1.09, 1.58)      | <b>0.02</b>        |
| Model 3b                | 1.64 (0.95, 2.84)     | 1.39 (0.79, 2.43) | ref                | 1.31 (1.03, 1.67)      | 0.08               |

*Notes:* Boldface indicates statistical significance ( $p < 0.05$ ). Model 1: Adjusted for sex (female, male), age (<65, ≥65, years). Model 2: Additional adjustment for history of hypertension (yes/no) and diabetes (yes/no). Model 3a: Additional adjustment for lymphopenia (<1.1, ≥1.1, ×10<sup>9</sup>/L), increased alanine aminotransferase (<40, ≥41, U/L), increased lactate dehydrogenase (<214, ≥214, U/L), and increased D-dimer (<0.5, ≥0.5, mg/L). Model 3b: Additional adjustment for increased alanine aminotransferase (<40, ≥41, U/L), increased lactate dehydrogenase (<214, ≥214, U/L), increased D-dimer (<0.5, ≥0.5, mg/L), and increased procalcitonin (<0.05, ≥0.05, ng/ml).

PCT, procalcitonin; LY, lymphocyte count; COVID-19, coronavirus disease 2019.

**Appendix**  
**Clinical Characteristics, Associated Factors, and Predicting COVID-19 Mortality Risk:**  
**A Retrospective Study in Wuhan, China**  
**Yu et al.**

**Appendix Figure 1.** Flow chart of research idea and research object selection.

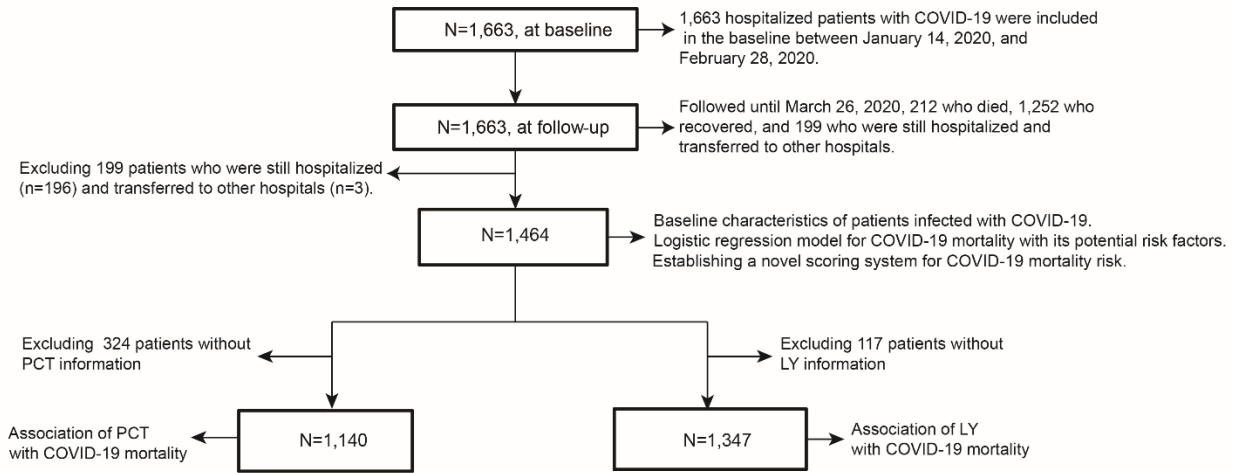

PCT, procalcitonin; LY, lymphocyte count

**Appendix**  
**Clinical Characteristics, Associated Factors, and Predicting COVID-19 Mortality Risk:**  
**A Retrospective Study in Wuhan, China**  
**Yu et al.**

**Appendix Figure 2.** AOR and 95% CI for COVID-19 mortality according to procalcitonin (PCT) concentrations.

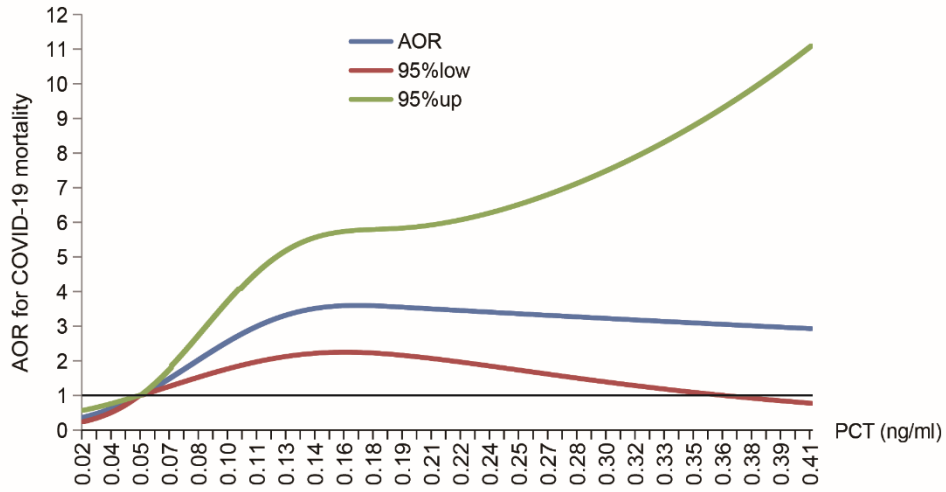

**Appendix**  
**Clinical Characteristics, Associated Factors, and Predicting COVID-19 Mortality Risk:**  
**A Retrospective Study in Wuhan, China**  
**Yu et al.**

**Appendix Figure 3.** The receiver operating characteristic curves for the prediction of COVID-19 mortality risk.

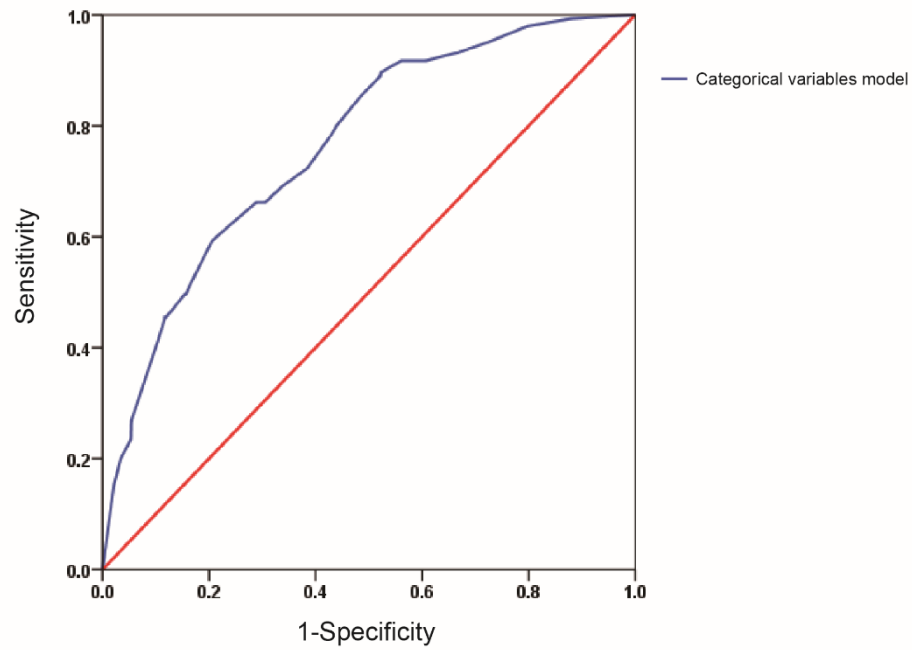

*Notes:* The areas under the curves (AUC) were 0.765 (95% CI=0.725, 0.805) for categorical variables model.
